# Supplementary material for: A unique adipocyte progenitor population promotes age-related adiposity
Source: Research Square preprint supplement (doi:10.21203/rs.3.rs-888694/v1), 2021-10-01
Supplement: Supplementary file 4 [file 5131b2cea195bb4232fca447.xlsx]

## Sheet: ASCpathway
Module	Pval	Enrichment	FDR	PathwaySource	Pathway	nOverlap	Overlap	ModuleSize	Direction (by over lapped gene number)	Direction (by meanFC)
ASC	7.90264e-05	8.92459	0.0171487	Biocarta	BIOCARTA_AGR_PATHWAY	4	UP: UTRN, DOWN: EGFR, LAMA4, LAMA2,	249	Down	-0.182789
ASC	2.64606e-20	10.4418	1.32303e-18	Hallmark	HALLMARK_EPITHELIAL_MESENCHYMAL_TRANSITION	26	UP: TNFRSF11B, FBLN2, SFRP4, DST, THBS2, TIMP3, CD44, CYR61, FGF2, THBS1, GJA1, PTX3, DOWN: SPARC, SFRP1, COL1A2, COL3A1, IGFBP4, LAMA2, FUCA1, GAS1, LAMC1, COL1A1, HTRA1, COL5A2, COL4A1, ELN,	249	Down	-0.0399945
ASC	1.96062e-10	8.14854	9.8031e-09	Hallmark	HALLMARK_COAGULATION	14	UP: PLAT, ADAM9, DPP4, TIMP3, CD9, THBS1, GDA, THBD, CFH, DOWN: SPARC, CTSH, C3, SERPING1, HTRA1,	249	UP	0.0339507
ASC	3.49229e-09	7.25123	1.74615e-07	Hallmark	HALLMARK_UV_RESPONSE_DN	13	UP: EFEMP1, IGFBP5, TGFBR2, CYR61, SDC2, NR1D2, IGF1R, GJA1, DOWN: COL1A2, COL3A1, LAMC1, COL1A1, COL5A2,	249	UP	0.146845
ASC	3.32243e-08	5.62249	1.66121e-06	Hallmark	HALLMARK_TNFA_SIGNALING_VIA_NFKB	14	UP: MARCKS, KLF4, KLF6, CD44, GFPT2, CYR61, TNFAIP6, KLF2, CCL2, PTX3, JUNB, DOWN: PHLDA1, TUBB2A, EDN1,	249	UP	0.217223
ASC	2.25784e-07	5.22088	1.12892e-05	Hallmark	HALLMARK_KRAS_SIGNALING_UP	13	UP: SPRY2, EMP1, PLAT, ALDH1A3, KLF4, IL33, DCBLD2, GFPT2, HSD11B1, TMEM158, CFH, DOWN: ACE, FUCA1,	249	UP	0.246041
ASC	1.42093e-06	4.81928	7.10464e-05	Hallmark	HALLMARK_IL2_STAT5_SIGNALING	12	UP: EMP1, WLS, AHNAK, KLF6, CD44, RORA, NDRG1, IGF1R, DOWN: ARL4A, PHLDA1, PENK,	249	UP	0.137022
ASC	8.24298e-06	4.41767	0.000412149	Hallmark	HALLMARK_HYPOXIA	11	UP: KLF6, CYR61, RORA, SDC2, NDRG1, UGP2, DOWN: EGFR, PRDX5, DDIT4, ADM, ERRFI1,	249	UP	-0.000363356
ASC	4.38465e-05	4.01606	0.00219233	Hallmark	HALLMARK_ADIPOGENESIS	10	UP: ENPP2, DOWN: LPL, C3, ACAA2, LAMA4, ETFB, ARL4A, ECH1, COL4A1, GPX3,	249	Down	-0.271398
ASC	4.38465e-05	4.01606	0.00219233	Hallmark	HALLMARK_MYOGENESIS	10	UP: FHL1, FGF2, DOWN: SPARC, IGFBP7, COL3A1, LAMA2, COL1A1, IGF1, AEBP1, GPX3,	249	Down	-0.274307
ASC	7.90264e-05	8.92459	0.00395132	Hallmark	HALLMARK_ANGIOGENESIS	4	UP: THBD, DOWN: LPL, COL3A1, COL5A2,	249	Down	-0.215288
ASC	0.000212559	3.61446	0.010628	Hallmark	HALLMARK_INTERFERON_GAMMA_RESPONSE	9	UP: B2M, TNFAIP6, CCL2, CFH, DOWN: SERPING1, IFI27, ARL4A,	249	UP	0.0761462
ASC	0.000271213	4.77156	0.0135606	Hallmark	HALLMARK_ANDROGEN_RESPONSE	6	UP: CDK6, ALDH1A3, B2M, UAP1, NDRG1, DOWN: HPGD,	249	UP	0.220593
ASC	0.000552595	5.94972	0.0276297	Hallmark	HALLMARK_TGF_BETA_SIGNALING	4	UP: SPTBN1, SMURF2, THBS1, JUNB, DOWN:	249	UP	0.296793
ASC	0.000932495	3.21285	0.0466248	Hallmark	HALLMARK_COMPLEMENT	8	UP: CD55, PLAT, ADAM9, DPP4, CFH, DOWN: CTSH, C3, SERPING1,	249	UP	0.0922675
ASC	0.000932495	3.21285	0.0466248	Hallmark	HALLMARK_P53_PATHWAY	8	UP: ZFP36L1, KLF4, TM4SF1, NDRG1, DOWN: NUPR1, STEAP3, FUCA1, DDIT4,	249	Down	-0.00473142
ASC	0.00134746	4.14027	0.0673732	Hallmark	HALLMARK_INTERFERON_ALPHA_RESPONSE	5	UP: CD47, B2M, DOWN: IFI27,	249	UP	0.0788137
ASC	0.0019255	3.8616	0.0962748	Hallmark	HALLMARK_PEROXISOME	5	UP: SEMA3C, PABPC1, DOWN: PRDX5, ECH1, ALDH1A1,	249	Down	0.048289
ASC	0.00230181	4.34169	0.115091	Hallmark	HALLMARK_CHOLESTEROL_HOMEOSTASIS	4	UP: CD9, DOWN: LPL, ECH1, ERRFI1,	249	Down	-0.182244
ASC	0.0027967	3.58577	0.139835	Hallmark	HALLMARK_BILE_ACID_METABOLISM	5	UP: ABCA5, DOWN: PRDX5, CYP27A1, SLC29A1, ALDH1A1,	249	Down	-0.1771
ASC	0.00367146	2.81124	0.183573	Hallmark	HALLMARK_ESTROGEN_RESPONSE_LATE	7	UP: KLF4, CD9, CD44, DOWN: IGFBP4, ETFB, SLC29A1, BLVRB,	249	Down	-0.0275832
ASC	0.00367146	2.81124	0.183573	Hallmark	HALLMARK_INFLAMMATORY_RESPONSE	7	UP: CD55, KLF6, DCBLD2, TNFAIP6, CCL2, DOWN: ADM, EDN1,	249	UP	0.235697
ASC	0.00367146	2.81124	0.183573	Hallmark	HALLMARK_XENOBIOTIC_METABOLISM	7	UP: HSD11B1, DOWN: IGFBP4, CYB5A, CYP27A1, IGF1, ECH1, BLVRB,	249	Down	-0.233893
ASC	0.00367146	2.81124	0.183573	Hallmark	HALLMARK_GLYCOLYSIS	7	UP: CD44, IL13RA1, SDC2, UGP2, DOWN: EGFR, CYB5A, DDIT4,	249	UP	0.0177312
ASC	0.00410589	2.99334	0.205294	Hallmark	HALLMARK_APOPTOSIS	6	UP: EMP1, PLAT, TIMP3, CD44, DOWN: GPX3,	249	UP	0.239263
ASC	0.0128474	2.40964	0.642371	Hallmark	HALLMARK_ESTROGEN_RESPONSE_EARLY	6	UP: KLF4, CD44, IGF1R, GJA1, DOWN: IGFBP4, BLVRB,	249	UP	0.096437
ASC	0.0143597	2.54181	0.717985	Hallmark	HALLMARK_FATTY_ACID_METABOLISM	5	UP: DOWN: ACAA2, ECH1, INMT, ALDH1A1, HPGD,	249	Down	-0.374533
ASC	0.0394955	2.00803	1	Hallmark	HALLMARK_MITOTIC_SPINDLE	5	UP: MARCKS, SPTBN1, EPB41L2, DST, TRIO, DOWN:	249	UP	0.354448
ASC	0.0394955	2.00803	1	Hallmark	HALLMARK_APICAL_JUNCTION	5	UP: TNFRSF11B, ADAM9, EPB41L2, DOWN: EGFR, ADAM23,	249	UP	0.0729338
ASC	0.105215	1.60643	1	Hallmark	HALLMARK_MTORC1_SIGNALING	4	UP: IGFBP5, CD9, DOWN: NUPR1, DDIT4,	249	Down	0.216455
ASC	0.0394955	2.00803	1	Hallmark	HALLMARK_OXIDATIVE_PHOSPHORYLATION	5	UP: CYB5R3, DOWN: ACAA2, CYB5A, ETFB, ECH1,	249	Down	-0.185957
ASC	0.0394955	2.00803	1	Hallmark	HALLMARK_ALLOGRAFT_REJECTION	5	UP: CCL11, CD47, B2M, CCL2, DOWN: EGFR,	249	UP	0.248028
ASC	2.91494e-16	15.2993	5.42179e-14	Kegg	KEGG_ECM_RECEPTOR_INTERACTION	16	UP: CD47, THBS2, CD44, SDC2, THBS1, DOWN: COL1A2, COL3A1, COL6A6, LAMA4, LAMA2, LAMB2, LAMC1, COL1A1, LAMB1, COL5A2, COL4A1,	249	Down	-0.123323
ASC	7.53748e-11	6.79334	1.40197e-08	Kegg	KEGG_FOCAL_ADHESION	17	UP: THBS2, THBS1, IGF1R, DOWN: COL1A2, COL3A1, COL6A6, EGFR, LAMA4, LAMA2, LAMB2, LAMC1, FIGF, COL1A1, LAMB1, IGF1, COL5A2, COL4A1,	249	Down	-0.240019
ASC	2.24043e-06	8.14854	0.00041672	Kegg	KEGG_COMPLEMENT_AND_COAGULATION_CASCADES	7	UP: CD55, PLAT, THBD, CFH, DOWN: C3, SERPING1, C7,	249	UP	0.0426533
ASC	9.94912e-06	6.69344	0.00185054	Kegg	KEGG_SMALL_CELL_LUNG_CANCER	7	UP: CDK6, DOWN: LAMA4, LAMA2, LAMB2, LAMC1, LAMB1, COL4A1,	249	Down	-0.21423
ASC	1.6653e-05	9.12742	0.00309745	Kegg	KEGG_AMINO_SUGAR_AND_NUCLEOTIDE_SUGAR_METABOLISM	5	UP: GFPT2, CYB5R3, UAP1, UGP2, GNPNAT1, DOWN:	249	UP	0.27483
ASC	1.67455e-05	3.42835	0.00311466	Kegg	KEGG_PATHWAYS_IN_CANCER	14	UP: TGFBR2, CDK6, FGF2, IGF1R, DOWN: EGFR, GSTP1, LAMA4, LAMA2, LAMB2, LAMC1, FIGF, LAMB1, IGF1, COL4A1,	249	Down	-0.167876
ASC	3.52214e-05	8.03213	0.00655118	Kegg	KEGG_GLUTATHIONE_METABOLISM	5	UP: DOWN: GGT5, MGST1, GSTP1, GPX3,	249	Down	-0.325733
ASC	0.00025535	5.65643	0.0474951	Kegg	KEGG_MELANOMA	5	UP: CDK6, FGF2, IGF1R, DOWN: EGFR, IGF1,	249	UP	-0.0304626
ASC	0.000768999	5.5394	0.143034	Kegg	KEGG_ARACHIDONIC_ACID_METABOLISM	4	UP: PTGS1, DOWN: GGT5, PLA2G2E, GPX3,	249	Down	-0.120975
ASC	0.0008604	4.51243	0.160034	Kegg	KEGG_PROSTATE_CANCER	5	UP: CREB5, IGF1R, DOWN: EGFR, GSTP1, IGF1,	249	Down	-0.136693
ASC	0.00117525	3.73587	0.218597	Kegg	KEGG_AXON_GUIDANCE	6	UP: SEMA3C, DPYSL2, NTN1, NTN4, SEMA3E, SEMA3D, DOWN:	249	UP	0.396628
ASC	0.00129191	4.94285	0.240295	Kegg	KEGG_GLIOMA	4	UP: CDK6, IGF1R, DOWN: EGFR, IGF1,	249	Down	-0.11522
ASC	0.00168853	4.65631	0.314067	Kegg	KEGG_P53_SIGNALING_PATHWAY	4	UP: CDK6, THBS1, DOWN: STEAP3, IGF1,	249	Down	-0.0670691
ASC	0.00180025	4.58979	0.334846	Kegg	KEGG_METABOLISM_OF_XENOBIOTICS_BY_CYTOCHROME_P450	4	UP: ALDH1A3, DOWN: MGST1, GSTP1,	249	Down	-0.0686369
ASC	0.00180025	4.58979	0.334846	Kegg	KEGG_PANCREATIC_CANCER	4	UP: TGFBR2, CDK6, DOWN: EGFR, FIGF,	249	Down	-0.0786409
ASC	0.00203979	4.46229	0.379402	Kegg	KEGG_DRUG_METABOLISM_CYTOCHROME_P450	4	UP: ALDH1A3, DOWN: MGST1, GSTP1,	249	Down	-0.0686369
ASC	0.00441315	3.73587	0.820845	Kegg	KEGG_TGF_BETA_SIGNALING_PATHWAY	4	UP: TGFBR2, THBS2, SMURF2, THBS1, DOWN:	249	UP	0.340386
ASC	0.00535116	3.56983	0.995315	Kegg	KEGG_GAP_JUNCTION	4	UP: GJA1, DOWN: EGFR, TUBB4B, TUBB2A,	249	Down	-0.187705
ASC	0.0502483	1.80497	1	Kegg	KEGG_MAPK_SIGNALING_PATHWAY	6	UP: TGFBR2, RRAS2, FGF2, DOWN: EGFR, PLA2G2E, NTRK2,	249	Down	0.00152133
ASC	0.0190412	2.1058	1	Kegg	KEGG_CYTOKINE_CYTOKINE_RECEPTOR_INTERACTION	7	UP: CCL11, TNFRSF11B, TGFBR2, IL13RA1, CCL2, DOWN: EGFR, FIGF,	249	UP	0.202144
ASC	0.0790854	1.75566	1	Kegg	KEGG_ENDOCYTOSIS	4	UP: SMURF2, PSD3, IGF1R, DOWN: EGFR,	249	UP	0.103948
ASC	5.50903e-09	4.25946	3.71309e-06	Reactome	REACTOME_DEVELOPMENTAL_BIOLOGY	21	UP: EBF1, SPTBN1, KLF4, DPYSL2, TRIO, NTN1, TCF4, NTN4, SEMA3E, PCSK6, DOWN: COL1A2, LPL, COL3A1, EGFR, COL4A5, LAMC1, COL1A1, LAMB1, COL5A2, SCN7A, COL4A1,	249	Down	-0.0237223
ASC	1.81648e-08	5.12008	1.22431e-05	Reactome	REACTOME_AXON_GUIDANCE	16	UP: SPTBN1, DPYSL2, TRIO, NTN1, NTN4, SEMA3E, DOWN: COL1A2, COL3A1, EGFR, COL4A5, LAMC1, COL1A1, LAMB1, COL5A2, SCN7A, COL4A1,	249	Down	-0.0849619
ASC	3.89305e-08	11.0788	2.62392e-05	Reactome	REACTOME_COLLAGEN_FORMATION	8	UP: COL14A1, DOWN: COL1A2, COL3A1, ADAMTS2, COL4A5, COL1A1, COL5A2, COL4A1,	249	Down	-0.203846
ASC	5.06755e-08	9.15053	3.41553e-05	Reactome	REACTOME_INTEGRIN_CELL_SURFACE_INTERACTIONS	9	UP: THBS1, DOWN: COL1A2, COL4A5, LAMA2, LAMB2, LAMC1, COL1A1, LAMB1, COL4A1,	249	Down	-0.243571
ASC	4.66655e-07	12.3571	0.000314526	Reactome	REACTOME_NCAM1_INTERACTIONS	6	UP: DOWN: COL1A2, COL3A1, COL4A5, COL1A1, COL5A2, COL4A1,	249	Down	-0.334619
ASC	1.25123e-06	8.78514	0.000843328	Reactome	REACTOME_NCAM_SIGNALING_FOR_NEURITE_OUT_GROWTH	7	UP: SPTBN1, DOWN: COL1A2, COL3A1, COL4A5, COL1A1, COL5A2, COL4A1,	249	Down	-0.247263
ASC	1.37035e-06	7.38587	0.000923615	Reactome	REACTOME_EXTRACELLULAR_MATRIX_ORGANIZATION	8	UP: COL14A1, DOWN: COL1A2, COL3A1, ADAMTS2, COL4A5, COL1A1, COL5A2, COL4A1,	249	Down	-0.203846
ASC	3.03702e-06	5.92534	0.00204695	Reactome	REACTOME_SIGNALING_BY_PDGF	9	UP: PLAT, THBS2, THBS1, DOWN: COL1A2, COL3A1, COL4A5, COL1A1, COL5A2, COL4A1,	249	Down	-0.106081
ASC	8.04932e-06	13.9689	0.00542524	Reactome	REACTOME_GLUTATHIONE_CONJUGATION	4	UP: DOWN: GGT5, MGST1, GSTP1,	249	Down	-0.350905
ASC	9.76019e-06	5.20066	0.00657837	Reactome	REACTOME_BIOLOGICAL_OXIDATIONS	9	UP: PTGS1, UGP2, DOWN: SULT1E1, GGT5, MGST1, GSTP1, CYP27A1, ALDH1A1,	249	Down	-0.27425
ASC	2.62004e-05	6.88468	0.0176591	Reactome	REACTOME_PHASE_II_CONJUGATION	6	UP: UGP2, DOWN: SULT1E1, GGT5, MGST1, GSTP1,	249	Down	-0.411318
ASC	4.39614e-05	10.0402	0.02963	Reactome	REACTOME_COMPLEMENT_CASCADE	4	UP: CD55, CFH, DOWN: C3, C7,	249	Down	-0.0152842
ASC	9.92067e-05	5.60381	0.0668653	Reactome	REACTOME_L1CAM_INTERACTIONS	6	UP: SPTBN1, DPYSL2, DOWN: EGFR, LAMC1, LAMB1, SCN7A,	249	Down	-0.117926
ASC	0.000123262	5.41492	0.0830783	Reactome	REACTOME_RESPONSE_TO_ELEVATED_PLATELET_CYTOSOLIC_CA2_	6	UP: CD9, THBS1, DOWN: SPARC, SERPING1, CD63, FIGF,	249	Down	-0.186651
ASC	0.000291199	3.47544	0.196268	Reactome	REACTOME_PLATELET_ACTIVATION_SIGNALING_AND_AGGREGATION	9	UP: DAGLB, CD9, THBS1, DOWN: SPARC, COL1A2, SERPING1, CD63, FIGF, COL1A1,	249	Down	-0.100577
ASC	0.135054	1.48058	1	Reactome	REACTOME_SIGNALLING_BY_NGF	4	UP: TRIO, PCSK6, DOWN: NTRK2, PCSK5,	249	Down	0.0167048
ASC	0.00560606	3.53061	1	Reactome	REACTOME_CELL_SURFACE_INTERACTIONS_AT_THE_VASCULAR_WALL	4	UP: CD47, THBD, DOWN: COL1A2, COL1A1,	249	Down	-0.0143451
ASC	0.113622	1.56724	1	Reactome	REACTOME_GASTRIN_CREB_SIGNALLING_PATHWAY_VIA_PKC_AND_MAPK	4	UP: DAGLB, TRIO, DOWN: EGFR, EDN1,	249	Down	0.110608
ASC	0.012664	2.89446	1	Reactome	REACTOME_GLYCOSAMINOGLYCAN_METABOLISM	4	UP: GPC6, CD44, CSGALNACT2, SDC2, DOWN:	249	UP	0.394424
ASC	0.446531	0.912742	1	Reactome	REACTOME_GENERIC_TRANSCRIPTION_PATHWAY	4	UP: SMURF2, RORA, NR1D2, JUNB, DOWN:	249	UP	0.286209
ASC	0.597992	0.873057	1	Reactome	REACTOME_SIGNALING_BY_GPCR	10	UP: CD55, CCL11, DAGLB, TRIO, CCL2, DOWN: C3, EGFR, ADM, EDN1, PENK,	249	Down	0.131493
ASC	0.0305808	2.1362	1	Reactome	REACTOME_PEPTIDE_LIGAND_BINDING_RECEPTORS	5	UP: CCL11, CCL2, DOWN: C3, EDN1, PENK,	249	Down	0.0432023
ASC	0.181533	1.31674	1	Reactome	REACTOME_CLASS_A1_RHODOPSIN_LIKE_RECEPTORS	5	UP: CCL11, CCL2, DOWN: C3, EDN1, PENK,	249	Down	0.0432023
ASC	0.0255583	2.41568	1	Reactome	REACTOME_DIABETES_PATHWAYS	4	UP: IGFBP5, KLF4, CCL2, DOWN: IGFBP4,	249	UP	0.426873
ASC	0.4093	0.972413	1	Reactome	REACTOME_TRANSMEMBRANE_TRANSPORT_OF_SMALL_MOLECULES	5	UP: SLCO3A1, DOWN: FTH1, ATP1A2, STEAP3, SLC29A1,	249	Down	-0.217571
ASC	0.31821	1.08542	1	Reactome	REACTOME_METABOLISM_OF_PROTEINS	7	UP: RPL23A, PABPC1, GFPT2, GNPNAT1, DOWN: TUBB4B, RPLP0, TUBB2A,	249	UP	0.0449072
ASC	0.877921	0.598668	1	Reactome	REACTOME_GPCR_DOWNSTREAM_SIGNALING	6	UP: DAGLB, TRIO, DOWN: C3, ADM, EDN1, PENK,	249	Down	-0.0143526
ASC	0.280119	1.13129	1	Reactome	REACTOME_METABOLISM_OF_MRNA	4	UP: ZFP36L1, RPL23A, PABPC1, DOWN: RPLP0,	249	UP	0.200921
ASC	0.392634	0.973591	1	Reactome	REACTOME_METABOLISM_OF_RNA	4	UP: ZFP36L1, RPL23A, PABPC1, DOWN: RPLP0,	249	UP	0.200921
ASC	0.138364	1.37806	1	Reactome	REACTOME_GPCR_LIGAND_BINDING	7	UP: CD55, CCL11, CCL2, DOWN: C3, ADM, EDN1, PENK,	249	Down	0.0838362
ASC	0.246638	1.17625	1	Reactome	REACTOME_METABOLISM_OF_LIPIDS_AND_LIPOPROTEINS	7	UP: RORA, HSD11B1, PLTP, SMPD3, DOWN: LPL, PLA2G2E, CYP27A1,	249	UP	0.0427503
ASC	0.0147724	2.52583	1	Reactome	REACTOME_INTERFERON_SIGNALING	5	UP: B2M, CD44, DOWN: IFI27,	249	UP	0.1035
ASC	0.0891359	1.62594	1	Reactome	REACTOME_METABOLISM_OF_CARBOHYDRATES	5	UP: GPC6, CD44, CSGALNACT2, SDC2, UGP2, DOWN:	249	UP	0.3659
ASC	0.00583049	2.06836	1	Reactome	REACTOME_HEMOSTASIS	12	UP: DAGLB, CD47, PLAT, CD9, THBS1, THBD, DOWN: SPARC, COL1A2, SERPING1, CD63, FIGF, COL1A1,	249	Down	0.00594924
ASC	0.13624	1.43945	1	Reactome	REACTOME_INNATE_IMMUNE_SYSTEM	5	UP: CD55, CFH, DOWN: C3, LBP, C7,	249	Down	-0.0835703
ASC	0.188238	1.20525	1	Reactome	REACTOME_IMMUNE_SYSTEM	14	UP: CD55, B2M, SMURF2, CD44, GAN, CFH, DOWN: CTSH, CYBA, C3, LBP, C7, IFI27,	249	Down	-0.0421215
ASC	0.508504	0.894114	1	Reactome	REACTOME_ADAPTIVE_IMMUNE_SYSTEM	6	UP: B2M, SMURF2, GAN, DOWN: CTSH, CYBA, C3,	249	Down	-0.0849483
ASC	0.121966	1.48743	1	Reactome	REACTOME_CYTOKINE_SIGNALING_IN_IMMUNE_SYSTEM	5	UP: B2M, CD44, DOWN: IFI27,	249	UP	0.1035
ASC	0.204202	1.28002	1	Reactome	REACTOME_CLASS_I_MHC_MEDIATED_ANTIGEN_PROCESSING_PRESENTATION	4	UP: B2M, SMURF2, GAN, DOWN: CYBA,	249	UP	0.107907

## Sheet: Sheet1
Module	Pval	Enrichment	FDR	PathwaySource	Pathway	Pathway	nOverlap	Overlap	ModuleSize	Direction (by over lapped gene number)	Direction (by meanFC)
ASC	1.96062e-10	8.14854	9.8031e-09	Hallmark	HALLMARK_COAGULATION	COAGULATION	14	UP: PLAT, ADAM9, DPP4, TIMP3, CD9, THBS1, GDA, THBD, CFH, DOWN: SPARC, CTSH, C3, SERPING1, HTRA1,	249	UP	0.0339507
ASC	3.49229e-09	7.25123	1.74615e-07	Hallmark	HALLMARK_UV_RESPONSE_DN	UV RESPONSE DN	13	UP: EFEMP1, IGFBP5, TGFBR2, CYR61, SDC2, NR1D2, IGF1R, GJA1, DOWN: COL1A2, COL3A1, LAMC1, COL1A1, COL5A2,	249	UP	0.146845
ASC	0.000552595	5.94972	0.0276297	Hallmark	HALLMARK_TGF_BETA_SIGNALING	TGF BETA SIGNALING	4	UP: SPTBN1, SMURF2, THBS1, JUNB, DOWN:	249	UP	0.296793
ASC	3.32243e-08	5.62249	1.66121e-06	Hallmark	HALLMARK_TNFA_SIGNALING_VIA_NFKB	TNFA SIGNALING VIA NFKB	14	UP: MARCKS, KLF4, KLF6, CD44, GFPT2, CYR61, TNFAIP6, KLF2, CCL2, PTX3, JUNB, DOWN: PHLDA1, TUBB2A, EDN1,	249	UP	0.217223
ASC	2.25784e-07	5.22088	1.12892e-05	Hallmark	HALLMARK_KRAS_SIGNALING_UP	KRAS SIGNALING	13	UP: SPRY2, EMP1, PLAT, ALDH1A3, KLF4, IL33, DCBLD2, GFPT2, HSD11B1, TMEM158, CFH, DOWN: ACE, FUCA1,	249	UP	0.246041
ASC	1.42093e-06	4.81928	7.10464e-05	Hallmark	HALLMARK_IL2_STAT5_SIGNALING	IL2 STAT5 SIGNALING	12	UP: EMP1, WLS, AHNAK, KLF6, CD44, RORA, NDRG1, IGF1R, DOWN: ARL4A, PHLDA1, PENK,	249	UP	0.137022
ASC	0.000271213	4.77156	0.0135606	Hallmark	HALLMARK_ANDROGEN_RESPONSE	ANDROGEN RESPONSE	6	UP: CDK6, ALDH1A3, B2M, UAP1, NDRG1, DOWN: HPGD,	249	UP	0.220593
ASC	8.24298e-06	4.41767	0.000412149	Hallmark	HALLMARK_HYPOXIA	HYPOXIA	11	UP: KLF6, CYR61, RORA, SDC2, NDRG1, UGP2, DOWN: EGFR, PRDX5, DDIT4, ADM, ERRFI1,	249	UP	-0.000363356
ASC	0.00134746	4.14027	0.0673732	Hallmark	HALLMARK_INTERFERON_ALPHA_RESPONSE	INTERFERON ALPHA RESPONSE	5	UP: CD47, B2M, DOWN: IFI27,	249	UP	0.0788137
ASC	0.000212559	3.61446	0.010628	Hallmark	HALLMARK_INTERFERON_GAMMA_RESPONSE	INTERFERON GAMMA RESPONSE	9	UP: B2M, TNFAIP6, CCL2, CFH, DOWN: SERPING1, IFI27, ARL4A,	249	UP	0.0761462
ASC	0.000932495	3.21285	0.0466248	Hallmark	HALLMARK_COMPLEMENT	COMPLEMENT	8	UP: CD55, PLAT, ADAM9, DPP4, CFH, DOWN: CTSH, C3, SERPING1,	249	UP	0.0922675
ASC	0.00410589	2.99334	0.205294	Hallmark	HALLMARK_APOPTOSIS	APOPTOSIS	6	UP: EMP1, PLAT, TIMP3, CD44, DOWN: GPX3,	249	UP	0.239263
ASC	0.00367146	2.81124	0.183573	Hallmark	HALLMARK_INFLAMMATORY_RESPONSE	INFLAMMATORY RESPONSE	7	UP: CD55, KLF6, DCBLD2, TNFAIP6, CCL2, DOWN: ADM, EDN1,	249	UP	0.235697
ASC	0.00367146	2.81124	0.183573	Hallmark	HALLMARK_GLYCOLYSIS	GLYCOLYSIS	7	UP: CD44, IL13RA1, SDC2, UGP2, DOWN: EGFR, CYB5A, DDIT4,	249	UP	0.0177312
ASC	0.0128474	2.40964	0.642371	Hallmark	HALLMARK_ESTROGEN_RESPONSE_EARLY	ESTROGEN RESPONSE EARLY	6	UP: KLF4, CD44, IGF1R, GJA1, DOWN: IGFBP4, BLVRB,	249	UP	0.096437
ASC	0.0394955	2.00803	1	Hallmark	HALLMARK_MITOTIC_SPINDLE	MITOTIC SPINDLE	5	UP: MARCKS, SPTBN1, EPB41L2, DST, TRIO, DOWN:	249	UP	0.354448
ASC	0.0394955	2.00803	1	Hallmark	HALLMARK_APICAL_JUNCTION	APICAL JUNCTION	5	UP: TNFRSF11B, ADAM9, EPB41L2, DOWN: EGFR, ADAM23,	249	UP	0.0729338
ASC	0.0394955	2.00803	1	Hallmark	HALLMARK_ALLOGRAFT_REJECTION	ALLOGRAFT REJECTION	5	UP: CCL11, CD47, B2M, CCL2, DOWN: EGFR,	249	UP	0.248028
ASC	7.90264e-05	8.92459	0.0171487	Biocarta	BIOCARTA_AGR_PATHWAY	BIOCARTA_AGR_PATHWAY	4	UP: UTRN, DOWN: EGFR, LAMA4, LAMA2,	249	Down	-0.182789
ASC	2.64606e-20	10.4418	1.32303e-18	Hallmark	HALLMARK_EPITHELIAL_MESENCHYMAL_TRANSITION	EPITHELIAL MESENCHYMA TRANSITION	26	UP: TNFRSF11B, FBLN2, SFRP4, DST, THBS2, TIMP3, CD44, CYR61, FGF2, THBS1, GJA1, PTX3, DOWN: SPARC, SFRP1, COL1A2, COL3A1, IGFBP4, LAMA2, FUCA1, GAS1, LAMC1, COL1A1, HTRA1, COL5A2, COL4A1, ELN,	249	Down	-0.0399945
ASC	7.90264e-05	8.92459	0.00395132	Hallmark	HALLMARK_ANGIOGENESIS	ANGIOGENESIS	4	UP: THBD, DOWN: LPL, COL3A1, COL5A2,	249	Down	-0.215288
ASC	0.00230181	4.34169	0.115091	Hallmark	HALLMARK_CHOLESTEROL_HOMEOSTASIS	CHOLESTEROL HOMEOSTASIS	4	UP: CD9, DOWN: LPL, ECH1, ERRFI1,	249	Down	-0.182244
ASC	4.38465e-05	4.01606	0.00219233	Hallmark	HALLMARK_ADIPOGENESIS	ADIPOGENESIS	10	UP: ENPP2, DOWN: LPL, C3, ACAA2, LAMA4, ETFB, ARL4A, ECH1, COL4A1, GPX3,	249	Down	-0.271398
ASC	4.38465e-05	4.01606	0.00219233	Hallmark	HALLMARK_MYOGENESIS	MYOGENESIS	10	UP: FHL1, FGF2, DOWN: SPARC, IGFBP7, COL3A1, LAMA2, COL1A1, IGF1, AEBP1, GPX3,	249	Down	-0.274307
ASC	0.0019255	3.8616	0.0962748	Hallmark	HALLMARK_PEROXISOME	PEROXISOME	5	UP: SEMA3C, PABPC1, DOWN: PRDX5, ECH1, ALDH1A1,	249	Down	0.048289
ASC	0.0027967	3.58577	0.139835	Hallmark	HALLMARK_BILE_ACID_METABOLISM	BILE ACID METABOLISM	5	UP: ABCA5, DOWN: PRDX5, CYP27A1, SLC29A1, ALDH1A1,	249	Down	-0.1771
ASC	0.000932495	3.21285	0.0466248	Hallmark	HALLMARK_P53_PATHWAY	P53 PATHWAY	8	UP: ZFP36L1, KLF4, TM4SF1, NDRG1, DOWN: NUPR1, STEAP3, FUCA1, DDIT4,	249	Down	-0.00473142
ASC	0.00367146	2.81124	0.183573	Hallmark	HALLMARK_ESTROGEN_RESPONSE_LATE	ESTROGEN RESPONSE LATE	7	UP: KLF4, CD9, CD44, DOWN: IGFBP4, ETFB, SLC29A1, BLVRB,	249	Down	-0.0275832
ASC	0.00367146	2.81124	0.183573	Hallmark	HALLMARK_XENOBIOTIC_METABOLISM	XENOBIOTIC METABOLISM	7	UP: HSD11B1, DOWN: IGFBP4, CYB5A, CYP27A1, IGF1, ECH1, BLVRB,	249	Down	-0.233893
ASC	0.0143597	2.54181	0.717985	Hallmark	HALLMARK_FATTY_ACID_METABOLISM	FATTY ACID METABOLISM	5	UP: DOWN: ACAA2, ECH1, INMT, ALDH1A1, HPGD,	249	Down	-0.374533
ASC	0.0394955	2.00803	1	Hallmark	HALLMARK_OXIDATIVE_PHOSPHORYLATION	OXIDATIVE PHOSPHORYLATION	5	UP: CYB5R3, DOWN: ACAA2, CYB5A, ETFB, ECH1,	249	Down	-0.185957
ASC	0.105215	1.60643	1	Hallmark	HALLMARK_MTORC1_SIGNALING	MTORC1 SIGNALING	4	UP: IGFBP5, CD9, DOWN: NUPR1, DDIT4,	249	Down	0.216455
