# Supplementary material for: A unique adipocyte progenitor population promotes age-related adiposity
Source: Research Square preprint supplement (doi:10.21203/rs.3.rs-888694/v1), 2021-10-01
Supplement: Supplementary file 5 [file acdfb95ddf7a91924014cbf1.xlsx]

## Sheet: CP-Apathway
Module	Pval	Enrichment	FDR	PathwaySource	Pathway	nOverlap	Overlap	ModuleSize	Direction(gene number)	Direction(meanFC)
CP-A	0.228685	1.22598	1	Hallmark	UV RESPONSE UP	4	UP: GPX3, PPP1R2, RHOB, DOWN: NTRK3,	413	UP	0.190317
CP-A	0.00305006	2.42131	0.152503	Hallmark	IL2 STAT5 SIGNALING	10	UP: PLIN2, SPRY4, IFNGR1, COL6A1, CD81, RHOB, DOWN: AHNAK, ECM1, ARL4A, NDRG1,	413	UP	0.0777861
CP-A	0.000960609	2.66344	0.0480305	Hallmark	INTERFERON GAMMA RESPONSE	11	UP: P2RY14, TXNIP, IFI30, IFITM2, VCAM1, CMKLR1, DOWN: PLA2G4A, CFH, ARL4A, SAMHD1, CCL2,	413	UP	0.049773
CP-A	0.000960609	2.66344	0.0480305	Hallmark	XENOBIOTIC_METABOLISM	11	UP: HSD11B1, VTN, GSTA3, CYB5A, JUP, IL1R1, DOWN: UGDH, SLC6A6, TGFB2, IGF1, APOE,	413	UP	0.0758849
CP-A	0.00927118	2.78311	0.463559	Hallmark	IL6 JAK STAT3 SIGNALING	5	UP: IFNGR1, IL1R1, OSMR, DOWN: CD9, JUN,	413	UP	0.0125137
CP-A	9.45036e-07	3.87409	4.72518e-05	Hallmark	ADIPOGENESIS	16	UP: LPL, COL4A1, PLIN2, COL15A1, SPARCL1, LIFR, IFNGR1, CD302, GPX3, ENPP2, DOWN: MGLL, C3, PTRF, ABCA1, ARL4A, APOE,	413	UP	0.257096
CP-A	1.93156e-07	4.11622	9.65779e-06	Hallmark	MYOGENESIS	17	UP: COL4A2, COL15A1, LAMA2, COL6A3, IGFBP7, GPX3, COL6A2, COL3A1, APOD, DOWN: LSP1, ABLIM1, CKB, FHL1, FGF2, IGF1, BAG1, AEBP1,	413	UP	0.0428165
CP-A	1.93156e-07	4.11622	9.65779e-06	Hallmark	KRAS SIGNALING UP	17	UP: HSD11B1, G0S2, SPARCL1, PLAU, MMD, SPON1, JUP, CMKLR1, DUSP6, APOD, DOWN: KLF4, TMEM100, GFPT2, TMEM158, CFH, IL33, AKAP12,	413	UP	0.0815096
CP-A	6.24393e-28	9.4431	3.12197e-26	Hallmark	EPITHELIAL MESENCHYMA TRANSITION	39	UP: THBS1, COL4A1, COL4A2, FAP, DCN, COL5A3, LAMA2, CXCL12, COL6A3, NID2, PLOD1, COL6A2, PDGFRB, PCOLCE, MMP2, COL3A1, VCAM1, MYL9, HTRA1, RHOB, DOWN: FBN1, FN1, FSTL1, PCOLCE2, ECM1, SFRP4, LOXL1, TNFRSF11B, POSTN, MFAP5, VCAN, JUN, PMEPA1, ELN, FBLN5, FGF2, GAS1, MGP, BASP1,	413	UP	-0.0788683
CP-A	0.396909	0.968523	1	Hallmark	MITOTIC SPINDLE	4	UP: SSH2, DOWN: FLNB, MYH10, TRIO,	413	Down	-0.156822
CP-A	0.396909	0.968523	1	Hallmark	MTORC1 SIGNALING	4	UP: IFI30, DOWN: CD9, IGFBP5, SLC6A6,	413	Down	-0.554616
CP-A	0.228685	1.22598	1	Hallmark	FATTY ACID METABOLISM	4	UP: G0S2, DOWN: S100A10, MGLL, UGDH,	413	Down	-0.225346
CP-A	0.121431	1.45278	1	Hallmark	MYC TARGETS V1	6	UP: DOWN: RPS5, RPS10, PABPC1, RPS6, EEF1B2, RPL22,	413	Down	-0.29659
CP-A	0.0563675	1.69492	1	Hallmark	ALLOGRAFT REJECTION	7	UP: CCL11, IFNGR1, EIF4G3, DOWN: RPS9, RPL39, TGFB2, CCL2,	413	Down	0.0576929
CP-A	0.0850514	1.7142	1	Hallmark	UNFOLDED PROTEIN RESPONSE	4	UP: KDELR3, DOWN: RPS14, EEF2, CCL2,	413	Down	-0.15104
CP-A	0.0235095	1.93705	1	Hallmark	ESTROGEN RESPONSE EARLY	8	UP: CXCL12, DOWN: KLF4, NBL1, FLNB, ABLIM1, MYOF, PRSS23, BAG1,	413	Down	-0.37162
CP-A	0.0235095	1.93705	1	Hallmark	P53 PATHWAY	8	UP: TXNIP, IFI30, CD81, DOWN: KLF4, S100A10, RPS12, JUN, NDRG1,	413	Down	-0.183999
CP-A	0.00305006	2.42131	0.152503	Hallmark	GLYCOLYSIS	10	UP: CYB5A, DCN, PLOD1, KDELR3, SDC2, DOWN: CHST1, VCAN, KIF2A, PAM, EXT1,	413	Down	-0.00011809
CP-A	0.0184541	2.61763	0.922705	Hallmark	CHOLESTEROL_HOMEOSTASIS	4	UP: LPL, DOWN: CD9, S100A11, ACTG1,	413	Down	-0.03753
CP-A	0.000960609	2.66344	0.0480305	Hallmark	ESTROGEN_RESPONSE_LATE	11	UP: CXCL12, CXCL14, DOWN: KLF4, NBL1, FLNB, UGDH, CD9, MYOF, CKB, PRSS23, BAG1,	413	Down	-0.278837
CP-A	0.000960609	2.66344	0.0480305	Hallmark	INFLAMMATORY_RESPONSE	11	UP: ADM, IL1R1, CMKLR1, OSMR, F3, DOWN: CD55, AXL, ABCA1, ATP2B1, SLC4A4, CCL2,	413	Down	-0.127217
CP-A	1.86561e-05	3.38983	0.000932806	Hallmark	TNFA_SIGNALING_VIA_NFKB	14	UP: G0S2, PLAU, KLF9, F3, RHOB, DOWN: KLF4, KLF2, GFPT2, JUN, PMEPA1, SPSB1, ABCA1, ATP2B1, CCL2,	413	Down	-0.173936
CP-A	0.00505328	3.58712	0.252664	Hallmark	TGF_BETA_SIGNALING	4	UP: THBS1, DOWN: PMEPA1, SMURF2, ID3,	413	Down	0.0334693
CP-A	0.000244748	3.83573	0.0122374	Hallmark	ANDROGEN_RESPONSE	8	UP: LIFR, STEAP4, SEPP1, DOWN: IQGAP2, PMEPA1, UAP1, AKAP12, NDRG1,	413	Down	-0.0305123
CP-A	9.45036e-07	3.87409	4.72518e-05	Hallmark	COMPLEMENT	16	UP: COL4A2, CP, CTSH, DUSP6, F3, DOWN: FN1, TIMP2, CD55, C3, DPP4, PLA2G4A, CFH, FYN, GNGT2, KIF2A, ATOX1,	413	Down	-0.256989
CP-A	1.30693e-06	4.21097	6.53465e-05	Hallmark	APOPTOSIS	14	UP: DCN, IFNGR1, GPX3, TXNIP, PDGFRB, MMP2, RHOB, DOWN: TIMP2, FEZ1, IGFBP6, JUN, ANXA1, HSPB1, TGFB2,	413	Down	-0.00327595
CP-A	0.00205235	4.40238	0.102617	Hallmark	APICAL SURFACE	4	UP: DOWN: SULF2, EFNA5, HSPB1, GAS1,	413	Down	-0.475757
CP-A	6.74667e-09	4.60048	3.37333e-07	Hallmark	HYPOXIA	19	UP: PLIN2, CP, DCN, ADM, KDELR3, SDC2, F3, DOWN: PTRF, JUN, PRKCDBP, SLC6A6, ANXA2, RBPJ, CSRP2, PAM, AKAP12, NDRG1, EXT1, PLAC8,	413	Down	-0.0319435
CP-A	3.10417e-07	4.7081	1.55208e-05	Hallmark	UV RESPONSE DN	14	UP: PTEN, PDGFRB, COL3A1, SDC2, F3, DOWN: MGLL, EFEMP1, IGFBP5, CDON, TGFBR2, ANXA2, FYN, FBLN5, ATP2B1,	413	Down	-0.220363
CP-A	1.15844e-09	4.84262	5.79221e-08	Hallmark	APICAL JUNCTION	20	UP: CLDN15, JUP, PTEN, ADAM23, CDK8, MMP2, VCAM1, MYL9, ADAMTS5, DOWN: FBN1, CD34, CADM3, TNFRSF11B, VCAN, ACTG1, THBS3, SIRPA, MYH10, FLNC, ZYX,	413	Down	-0.0796991
CP-A	0.000493531	4.94144	0.0246765	Hallmark	REACTIVE OXIGEN SPECIES PATHWAY	5	UP: MGST1, GPX3, DOWN: LSP1, PDLIM1, ATOX1,	413	Down	-0.133486
CP-A	9.22899e-13	7.01828	4.61449e-11	Hallmark	COAGULATION	20	UP: THBS1, PLAU, P2RY1, CTSH, MMP2, CTSK, DUSP6, CRIP2, HTRA1, F3, DOWN: FBN1, FN1, C3, CD9, DPP4, ANXA1, CFH, FYN, PRSS23, THBD,	413	Down	-0.101273
CP-A	3.59674e-08	10.7614	1.79837e-06	Hallmark	ANGIOGENESIS	8	UP: LPL, VTN, COL3A1, DOWN: FSTL1, POSTN, VCAN, SLCO2A1, THBD,	413	Down	-0.095105
